# Supplementary material
Source: Springer Nature journal article supplement (https://www.springermedizin.de/resource/supplementary/12874_2009_356_MOESM3_ESM.pdf/9434300)

## Practice Recruitment (Belfast)

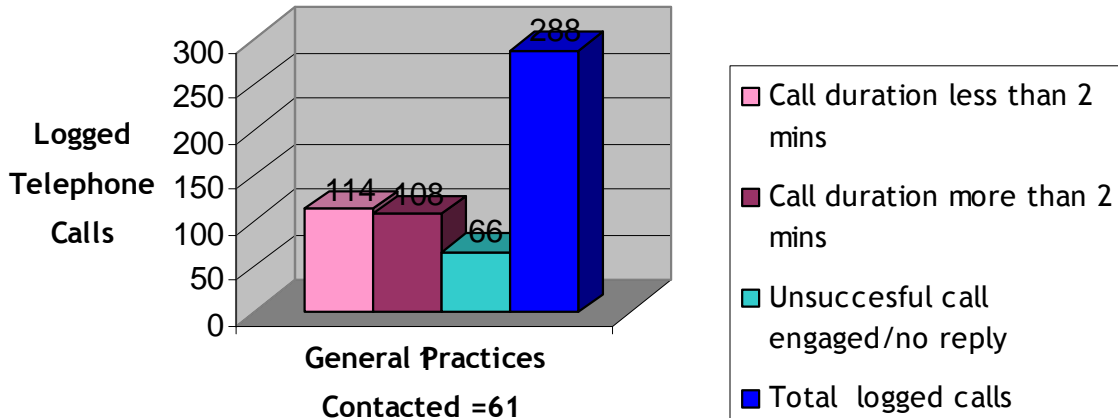

Supplement: MOESM3 [file 9434300]
